# Supplementary material
Source: publisher site journal article supplement (https://www.dovepress.com/article/528072)
Supplement: Supplementary file 1 [file 528072-supplementary-tables.docx]

**Supplement**

**Table S1:** List of Designed and Obtained Primers

| Gene | Primer |
| --- | --- |
| mACOD1-F | GGTATCATTCGGAGGAGCAAGAG |
| mACOD1-R | ACAGTGCTGGAGGTGTTGGAAC |
| mACTB-F | CATTGCTGACAGGATGCAGAAGG |
| mACTB-R | TGCTGGAAGGTGGACAGTGAGG |
| mIL-10-F | CGGGAAGACAATAACTGCACCC |
| mIL-10-R | CGGTTAGCAGTATGTTGTCCAGC |
| mIL-6-F | TACCACTTCACAAGTCGGAGGC |
| mIL-6-R | CTGCAAGTGCATCATCGTTGTTC |
| mIL-17A-F | CAGACTACCTCAACCGTTCCAC |
| mIL-17A-R | TCCAGCTTTCCCTCCGCATTGA |

**Table S2:** Causal Associations of Cytokines with Ulcerative Colitis (UC) Using the Inverse-Variance Weighted (IVW) Method

| outcome | exposure | method | nsnp | bate | se | pval | or |
| --- | --- | --- | --- | --- | --- | --- | --- |
| UC | Macrophage colony-stimulating factor levels | IVW | 15 | -1.160492256 | 0.372719805 | 0.001848335 | 0.313331904 |
| UC | Interleukin-10 receptor subunit alpha levels | IVW | 15 | 0.585713437 | 0.232128787 | 0.011628357 | 1.796272056 |
| UC | Interleukin-6 levels | IVW | 8 | -0.859898124 | 0.374107534 | 0.021531531 | 0.423205195 |
| UC | SIR2-like protein 2 levels | IVW | 7 | 0.893058677 | 0.437723258 | 0.041326842 | 2.442589328 |
| UC | Urokinase-type plasminogen activator levels | IVW | 24 | 0.537510191 | 0.238011463 | 0.023924631 | 1.711739648 |

**Table S3:** Absence of Reverse Causal Relationships Between Cytokines and Ulcerative Colitis (UC) Using the Inverse-Variance Weighted (IVW) Method

| outcome | exposure | method | nsnp | bate | se | pval | or | revPvale |
| --- | --- | --- | --- | --- | --- | --- | --- | --- |
| UC | Macrophage colony-stimulating factor levels | IVW | 15 | -1.160492256 | 0.372719805 | 0.001848335 | 0.313331904 | 0.968378501 |
| UC | Interleukin-10 receptor subunit alpha levels | IVW | 15 | 0.585713437 | 0.232128787 | 0.011628357 | 1.796272056 | 0.987336281 |
| UC | Interleukin-6 levels | IVW | 8 | -0.859898124 | 0.374107534 | 0.021531531 | 0.423205195 | 0.577306344 |
| UC | SIR2-like protein 2 levels | IVW | 7 | 0.893058677 | 0.437723258 | 0.041326842 | 2.442589328 | 0.638325245 |

**Table S4:** Causal Associations of Metabolites with Ulcerative Colitis (UC) Using the Inverse-Variance Weighted (IVW) Method

| outcome | exposure | method | nsnp | bate | se | pval | or |
| --- | --- | --- | --- | --- | --- | --- | --- |
| UC | Aconitate levels | IVW | 12 | -0.817535059 | 0.30643929 | 0.007633759 | 0.441518632 |
| UC | 4-hydroxycoumarin levels | IVW | 12 | 0.723942502 | 0.279534572 | 0.009602785 | 2.062548806 |
| UC | Alpha-ketoglutaramate levels | IVW | 14 | -0.5426907 | 0.204576015 | 0.007983704 | 0.581182359 |
| UC | Sphingomyelin levels | IVW | 5 | -1.316724724 | 0.440384525 | 0.002790293 | 0.268011678 |
| UC | Cortolone glucuronide levels | IVW | 11 | 0.824590225 | 0.317692311 | 0.009443625 | 2.280945898 |
| UC | 6-bromotryptophan levels | IVW | 10 | -0.794075103 | 0.282738149 | 0.004977014 | 0.451999094 |
| UC | Hydroxy-N6,N6,N6-trimethyllysine levels | IVW | 12 | -1.003612539 | 0.323426695 | 0.001915306 | 0.36655286 |
| UC | Anthranilate levels | IVW | 14 | 0.62465076 | 0.235375282 | 0.007957913 | 1.867593605 |
| UC | Cholesterol to cortisol ratio | IVW | 8 | 1.247399034 | 0.370202515 | 0.000753035 | 3.481276488 |
| UC | Benzoate to linoleoyl-arachidonoyl-glycerol ratio | IVW | 17 | 0.393521999 | 0.124389556 | 0.00155817 | 1.48219189 |

**Table S5:** Role of Aconitate as a Mediator in the Pathway Linking Macrophage Colony-Stimulating Factor (M-CSF) and Ulcerative Colitis (UC) Using Mendelian Randomization

| exposure | outcome | method | nsnp | bate | pval | or |
| --- | --- | --- | --- | --- | --- | --- |
| M-CSF levels | Aconitate levels | MR Egger | 30 | 0.002803299 | 0.979553783 | 1.002807232 |
| M-CSF levels | Aconitate levels | Weighted median | 30 | 0.106571423 | 0.111353023 | 1.112457379 |
| M-CSF levels | Aconitate levels | Inverse variance weighted | 30 | 0.09498928 | 0.043343857 | 1.099647067 |
| M-CSF levels | Aconitate levels | Simple mode | 30 | 0.050266424 | 0.628985828 | 1.051551218 |
| M-CSF levels | Aconitate levels | Weighted mode | 30 | 0.093818191 | 0.250284061 | 1.098360036 |

**Table S6:** Causal Relationship Between Aconitate and Ulcerative Colitis (UC) Risk

| exposure | outcome | method | nsnp | bate | pval | or |
| --- | --- | --- | --- | --- | --- | --- |
| Aconitate levels | UC | MR Egger | 12 | -0.905546999 | 0.176070626 | 0.404320662 |
| Aconitate levels | UC | Weighted median | 12 | -0.801812998 | 0.067537067 | 0.44851507 |
| Aconitate levels | UC | Inverse variance weighted | 12 | -0.817535059 | 0.007633759 | 0.441518632 |
| Aconitate levels | UC | Simple mode | 12 | -0.978697622 | 0.200145171 | 0.375800214 |
| Aconitate levels | UC | Weighted mode | 12 | -0.509801026 | 0.37873142 | 0.600615074 |

**Table S7:** Causal Relationship Between Macrophage Colony-Stimulating Factor (M-CSF) and Ulcerative Colitis (UC) Risk

| exposure | outcome | method | nsnp | bate | pval | or |
| --- | --- | --- | --- | --- | --- | --- |
| M-CSF levels | UC | MR Egger | 15 | -2.362249082 | 0.043164903 | 0.094208103 |
| M-CSF levels | UC | Weighted median | 15 | -1.169219253 | 0.012315782 | 0.310609354 |
| M-CSF levels | UC | Inverse variance weighted | 15 | -1.160492256 | 0.001848335 | 0.313331904 |
| M-CSF levels | UC | Simple mode | 15 | -0.715218203 | 0.399388412 | 0.48908538 |
| M-CSF levels | UC | Weighted mode | 15 | -1.640220148 | 0.008135477 | 0.193937343 |

**Table S8:** F-Statistics of Selected Single Nucleotide Polymorphisms (SNPs)

| exposure | SNP | chr.  exposure | pos.  exposure | Effect-allele.  exposure | Other-allele.  exposure | beta.  exposure | se.  exposure | pval.  exposure | Sample size.  exposure | R2 | F |
| --- | --- | --- | --- | --- | --- | --- | --- | --- | --- | --- | --- |
| M-CSF | rs7538029 | 1 | 110474695 | A | C | 0.0775 | 0.0165 | 2.64E-06 | 11335 | 0.001942538 | 22.0576317 |
| M-CSF | rs17610659 | 1 | 110503296 | T | C | 0.1684 | 0.0118 | 3.31E-46 | 14286 | 0.014056 | 203.6382496 |
| M-CSF | rs142421172 | 1 | 179682087 | A | G | 0.1439 | 0.031 | 3.45E-06 | 12840 | 0.001675348 | 21.54420872 |
| M-CSF | rs11806838 | 1 | 190519358 | T | C | 0.0674 | 0.0152 | 9.24E-06 | 14286 | 0.001374436 | 19.65947034 |
| M-CSF | rs11685487 | 2 | 8775320 | T | C | 0.0944 | 0.0196 | 1.46E-06 | 14286 | 0.001621125 | 23.19375373 |
| M-CSF | rs846654 | 2 | 10646611 | T | C | -0.0519 | 0.0114 | 5.30E-06 | 14707 | 0.001407308 | 20.72363571 |
| M-CSF | rs116443177 | 2 | 27764122 | T | C | 0.0827 | 0.0173 | 1.75E-06 | 12403 | 0.001839046 | 22.84803086 |
| M-CSF | rs115370595 | 2 | 140484970 | A | G | -0.2277 | 0.0496 | 4.42E-06 | 13799 | 0.001524938 | 21.0717089 |
| M-CSF | rs72997796 | 3 | 1456080 | C | G | 0.0888 | 0.0192 | 3.75E-06 | 14286 | 0.001495075 | 21.38763037 |
| M-CSF | rs188348611 | 3 | 47563522 | A | T | 0.1847 | 0.0412 | 7.36E-06 | 12354 | 0.001624149 | 20.09412247 |
| M-CSF | rs76421506 | 3 | 115295680 | A | G | 0.0778 | 0.0168 | 3.64E-06 | 14286 | 0.00149892 | 21.44271761 |
| M-CSF | rs74849049 | 3 | 171430935 | T | G | -0.0914 | 0.02 | 4.88E-06 | 14286 | 0.00145978 | 20.88197617 |
| M-CSF | rs78652121 | 4 | 13713646 | C | G | -0.1189 | 0.026 | 4.81E-06 | 12838 | 0.001626345 | 20.90977456 |
| M-CSF levels | rs145227560 | 4 | 48122174 | A | ATATGTATG | 0.0701 | 0.015 | 2.96E-06 | 10894 | 0.002000766 | 21.83603489 |
| M-CSF | rs116039112 | 4 | 154438727 | A | G | 0.2238 | 0.0504 | 8.98E-06 | 14286 | 0.001378318 | 19.71506836 |
| M-CSF | rs75305583 | 4 | 183461339 | T | C | -0.1493 | 0.0329 | 5.68E-06 | 14286 | 0.001439433 | 20.59050581 |
| M-CSF | rs10042665 | 5 | 78775099 | C | G | 0.0583 | 0.0122 | 1.76E-06 | 14727 | 0.001548211 | 22.83276279 |
| M-CSF | rs3934571 | 5 | 174229899 | T | C | -0.0802 | 0.018 | 8.37E-06 | 14732 | 0.001345728 | 19.84928023 |
| M-CSF | rs2523992 | 6 | 30075103 | T | G | -0.075 | 0.0152 | 8.05E-07 | 14734 | 0.001649672 | 24.34312872 |
| M-CSF | rs11390042 | 6 | 90870805 | CA | C | -0.0673 | 0.0147 | 4.69E-06 | 10894 | 0.001920319 | 20.95635374 |
| M-CSF | rs7825914 | 8 | 19590012 | A | G | 0.054 | 0.0122 | 9.59E-06 | 14732 | 0.001328095 | 19.58884794 |
| M-CSF | rs12549430 | 8 | 80715263 | A | G | -0.061 | 0.0135 | 6.23E-06 | 14286 | 0.001427122 | 20.41415128 |
| M-CSF | rs1605333 | 12 | 58388232 | C | G | -0.0601 | 0.0124 | 1.25E-06 | 13237 | 0.00177152 | 23.48767076 |
| M-CSF | rs142902162 | 13 | 75660663 | T | C | 0.3234 | 0.0723 | 7.71E-06 | 12898 | 0.001548845 | 20.00488635 |
| M-CSF | rs17734417 | 14 | 58461604 | T | C | -0.1225 | 0.0265 | 3.79E-06 | 14723 | 0.001449286 | 21.36591174 |
| M-CSF | rs75869070 | 14 | 78693608 | A | G | 0.1151 | 0.0239 | 1.47E-06 | 14715 | 0.001573659 | 23.1897365 |
| M-CSF | rs28673875 | 15 | 45690795 | A | T | -0.2096 | 0.046 | 5.20E-06 | 14236 | 0.001456284 | 20.75897354 |
| M-CSF | rs34674345 | 15 | 63787216 | T | C | -0.2243 | 0.0503 | 8.22E-06 | 14286 | 0.001389978 | 19.88207798 |
| M-CSF | rs72783071 | 16 | 60437963 | T | C | -0.199 | 0.0414 | 1.53E-06 | 14247 | 0.001619117 | 23.10172979 |
| M-CSF | rs17638424 | 18 | 3048453 | A | T | 0.1034 | 0.023 | 6.94E-06 | 14715 | 0.001371605 | 20.20814149 |
| M-CSF | rs7227917 | 18 | 45546185 | A | G | -0.0872 | 0.0185 | 2.43E-06 | 14286 | 0.001552759 | 22.21409929 |
| M-CSF | rs117591817 | 19 | 58875573 | C | G | -0.1989 | 0.0435 | 4.82E-06 | 14286 | 0.00146132 | 20.90404098 |
| Aconitate | rs9442514 | 1 | 9295877 | T | G | 0.258543 | -0.0776271 | 4.48E-06 | 8262 | 0.002541092 | 21.04289378 |
| Aconitate | rs60720023 | 1 | 58351813 | T | G | 0.209322 | -0.0842184 | 2.29E-06 | 8262 | 0.002696342 | 22.33199646 |
| Aconitate | rs6696988 | 1 | 97293840 | T | C | 0.0361585 | 0.181555 | 2.93E-06 | 8262 | 0.002639206 | 21.85753133 |
| Aconitate | rs74921091 | 1 | 221445673 | A | G | 0.0321151 | -0.208182 | 3.41E-07 | 8262 | 0.003137104 | 25.9940235 |
| Aconitate | rs140657214 | 2 | 10518902 | T | G | 0.00528426 | 0.450623 | 5.48E-06 | 8262 | 0.002494385 | 20.65513878 |
| Aconitate | rs2241978 | 2 | 113196429 | G | A | 0.480908 | -0.0701503 | 2.31E-06 | 8262 | 0.002694208 | 22.31428141 |
| Aconitate | rs150384494 | 2 | 151057909 | A | T | 0.0305302 | 0.20601 | 1.34E-06 | 8262 | 0.00281977 | 23.35716425 |
| Aconitate | rs77371432 | 2 | 211493056 | A | G | 0.0870593 | 0.119313 | 3.68E-06 | 8262 | 0.002586471 | 21.4196507 |
| Aconitate | rs114248155 | 3 | 29415561 | G | A | 0.0188976 | 0.243086 | 4.50E-06 | 8262 | 0.002539926 | 21.03321316 |
| Aconitate | rs17250977 | 5 | 14753636 | G | A | 0.0421563 | -0.161921 | 6.12E-06 | 8262 | 0.002469291 | 20.44682993 |
| Aconitate | rs835157 | 5 | 14874424 | C | T | 0.448247 | -0.0673172 | 5.39E-06 | 8262 | 0.002498472 | 20.68906661 |
| Aconitate | rs55659629 | 5 | 77997018 | A | T | 0.228216 | -0.0781093 | 6.91E-06 | 8262 | 0.002441092 | 20.21276407 |
| Aconitate | rs137889685 | 6 | 114845601 | C | G | 0.0061227 | -0.416698 | 6.25E-06 | 8262 | 0.002464284 | 20.40527338 |
| Aconitate | rs7824084 | 8 | 13126334 | T | C | 0.0580589 | 0.138698 | 8.41E-06 | 8262 | 0.002396005 | 19.83853586 |
| Aconitate | rs78494692 | 8 | 98165634 | A | C | 0.0562339 | 0.143788 | 8.66E-06 | 8262 | 0.00238914 | 19.78155321 |
| Aconitate | rs943329 | 10 | 17980946 | G | T | 0.484988 | 0.064315 | 9.77E-06 | 8262 | 0.002361493 | 19.55210311 |
| Aconitate | rs7995121 | 13 | 18881817 | A | G | 0.153461 | 0.100418 | 1.87E-06 | 8262 | 0.002742302 | 22.71369885 |
| Aconitate | rs142657783 | 13 | 70583480 | C | T | 0.0218217 | 0.240461 | 1.40E-06 | 8262 | 0.002809976 | 23.2758083 |
| Aconitate | rs218666 | 17 | 6715791 | G | A | 0.407072 | 0.0813323 | 1.36E-07 | 8262 | 0.003351288 | 27.77472123 |
| Aconitate | rs8066321 | 17 | 16982909 | C | T | 0.758497 | 0.0789034 | 5.09E-06 | 8262 | 0.002511812 | 20.79980952 |
| Aconitate | rs138826414 | 18 | 78977595 | C | G | 0.0200122 | -0.239199 | 3.99E-06 | 8262 | 0.002568058 | 21.26677597 |
| Aconitate | rs117688292 | 20 | 43162294 | A | G | 0.0144761 | 0.278508 | 3.86E-06 | 8262 | 0.002575466 | 21.3282758 |
| Aconitate | rs807666 | 22 | 19173036 | T | C | 0.624483 | -0.0875948 | 4.51E-09 | 8262 | 0.00414532 | 34.38287518 |
| Aconitate | rs190697977 | 22 | 20480854 | T | C | 0.0233947 | 0.219165 | 5.22E-06 | 8262 | 0.002505588 | 20.74814051 |
